# Supplementary material
Source: PubMed Central journal article supplement (PMC4393436)
Supplement: AEM.04042-14_zam999116210so1.pdf [file AEM.04042-14_zam999116210so1.pdf]

## Supplemental Information

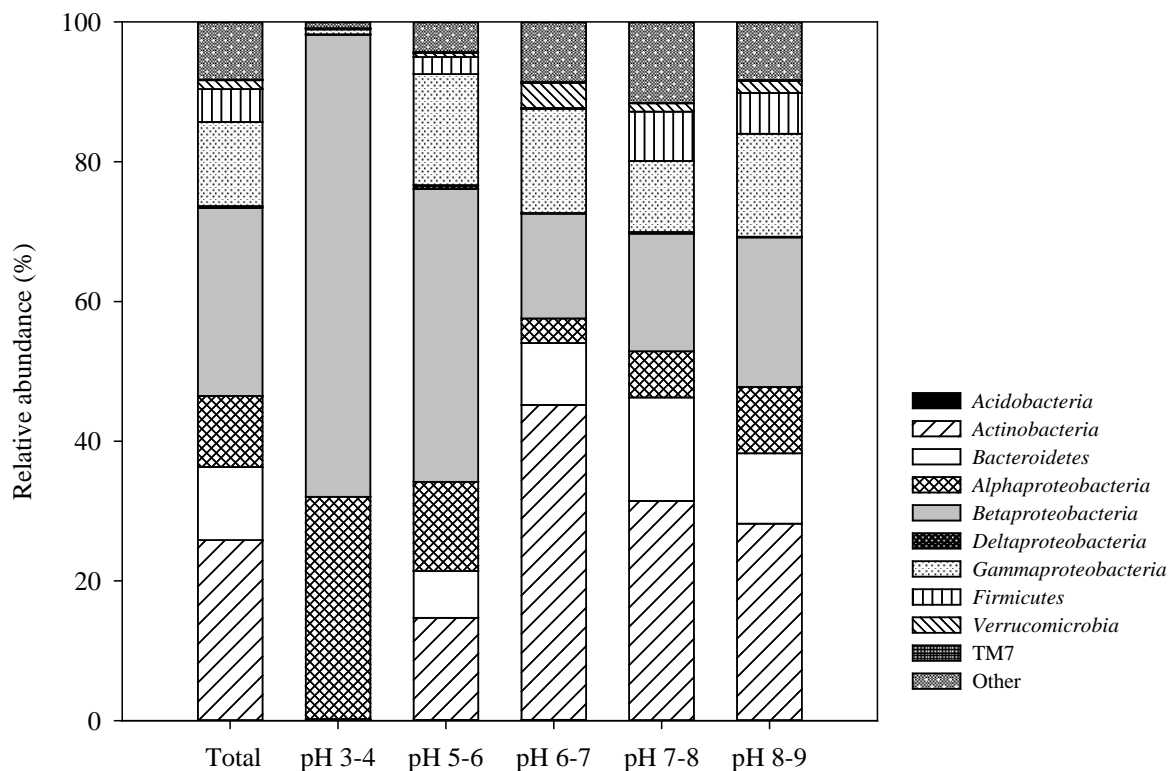

2

3 **FIG S1** Relative abundances of the dominant bacterial taxa in all lakes combined (Total)

4 and divided into different pH categories. The predominant phyla (subphyla) across all lakes

5 were *Betaproteobacteria*, *Actinobacteria*, *Gammaproteobacteria*, *Bacteroidetes*, and6 *Alphaproteobacteria*.

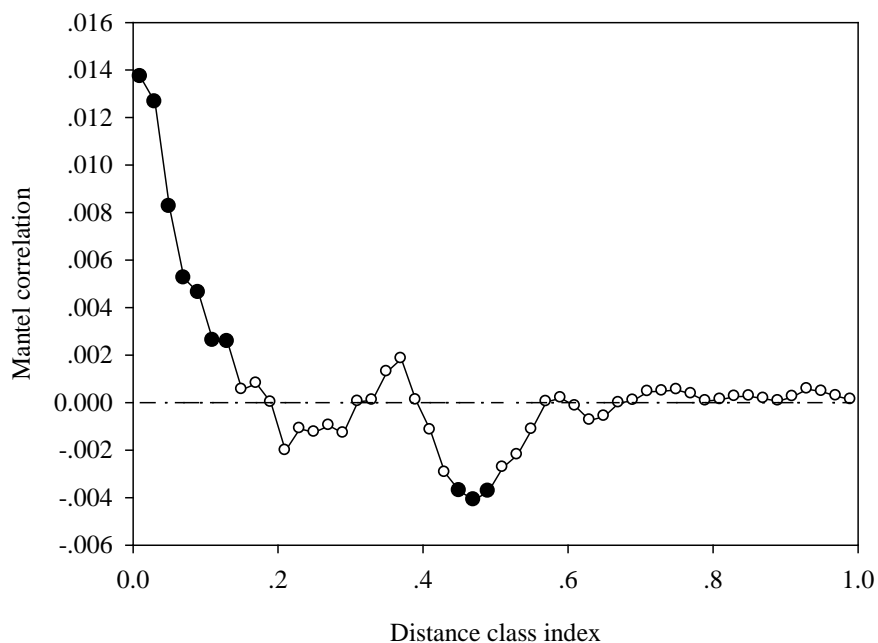

7  
8 **FIG S2** Pearson's correlation resulting from the Mantel correlogram (9999 permutations)  
9 between the pairwise matrix of OTU niche distances and OTU phylogenetic distances. The  
10 phylogenetic signal in habitat associations was indicated by significant correlations ( $P < 0.05$ ,  
11 filled circles). A significantly positive relationship between bacterioplankton ecological  
12 differences and phylogenetic distance was detected across relatively short phylogenetic  
13 distances.

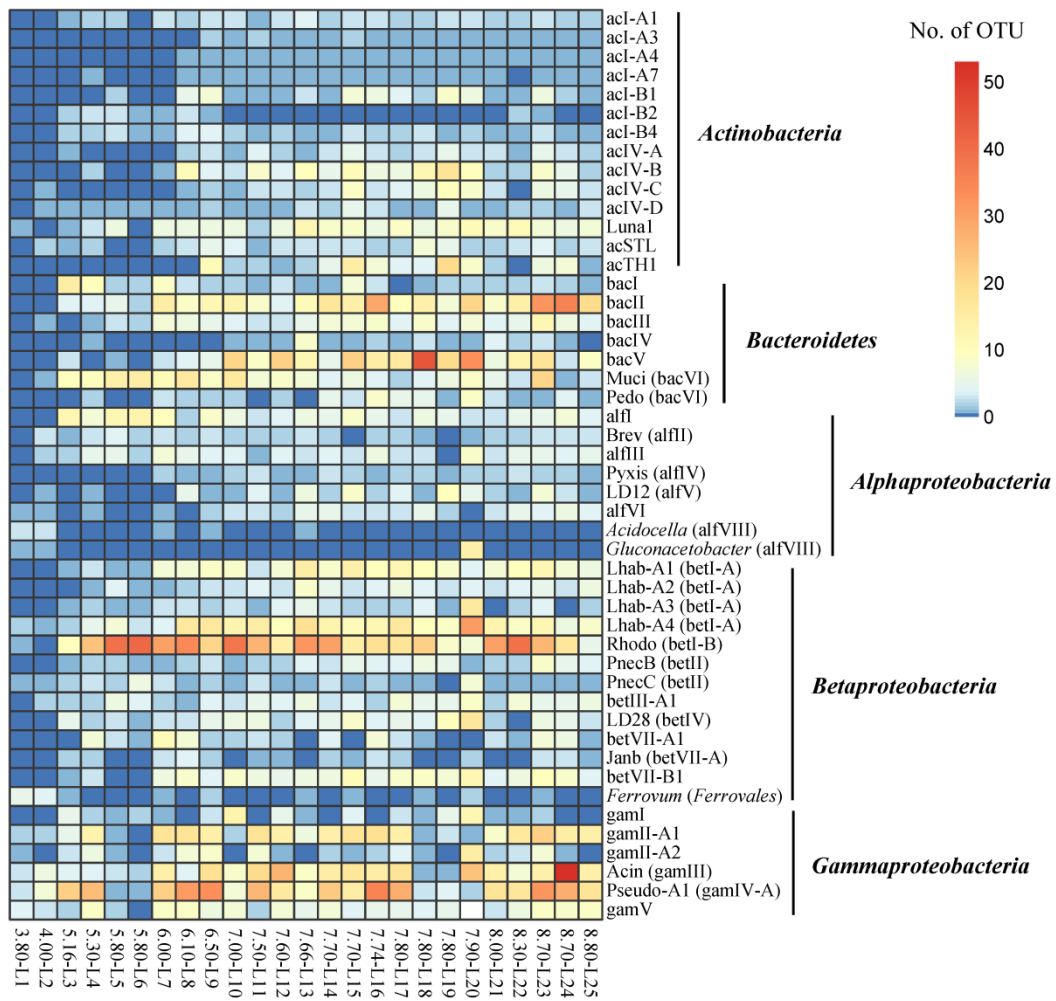

14

15

**FIG S3** Heat map describing the number of OTUs within each main lineage or clade of

16

bacterioplankton communities (Y axis) across the pH gradient (X axis). Overall

17

bacterioplankton communities tended to be more phylogenetically distant to each other in

18

more acidic lakes.

19  
20**TABLE S1** Summary of the relevant site characteristics of the investigated lakes and of the pyrosequencing results.

| No. | Lake name           | Location         | No. of sequences | Accession no. | pH   | TOC (mg·L <sup>-1</sup> ) | TP (mg·L <sup>-1</sup> ) | TFe (mg·L <sup>-1</sup> ) | TN (mg·L <sup>-1</sup> ) | NO <sub>x</sub> <sup>-</sup> (mg·L <sup>-1</sup> ) | Conductivity (μS·cm <sup>-1</sup> ) | Area (km <sup>2</sup> ) |
|-----|---------------------|------------------|------------------|---------------|------|---------------------------|--------------------------|---------------------------|--------------------------|----------------------------------------------------|-------------------------------------|-------------------------|
| L1  | No name 1           | 56.020°N,9.089°E | 24561            | SRS518504     | 3.80 | 0.50                      | 0.01                     | 0.55                      | 0.62                     | 0.43                                               | 317.00                              | 0.01                    |
| L2  | No name 2           | 56.018°N,9.087°E | 23257            | SRS518506     | 4.00 | 0.37                      | 0.01                     | 0.24                      | 0.59                     | 0.29                                               | 208.00                              | 0.10                    |
| L3  | Vejlbo Mose         | 56.154°N,9.554°E | 22490            | SRS517772     | 5.16 | 31.90                     | 0.17                     | 0.87                      | 2.04                     | 0.02                                               | 297.00                              | 0.03                    |
| L4  | Brude Sø            | 56.054°N,9.681°E | 28200            | SRS518415     | 5.30 | 8.81                      | 0.21                     | 0.25                      | 1.14                     | 0.01                                               | 65.00                               | 0.02                    |
| L5  | No name 3           | 56.035°N,9.094°E | 29014            | SRS518503     | 5.80 | 2.99                      | 0.03                     | 0.97                      | 1.44                     | 1.36                                               | 238.00                              | 0.16                    |
| L6  | Ræv Sø              | 56.025°N,9.444°E | 29426            | SRS518524     | 5.80 | 3.14                      | 0.02                     | 0.02                      | 0.30                     | 0.01                                               | 59.00                               | 0.06                    |
| L7  | No name 4           | 56.020°N,9.095°E | 31825            | SRS518505     | 6.00 | 7.48                      | 0.02                     | 0.33                      | 0.31                     | 0.01                                               | 154.00                              | 0.03                    |
| L8  | No name 5           | 56.041°N,9.074°E | 21136            | SRS518502     | 6.10 | 4.93                      | 0.01                     | 3.54                      | 0.31                     | 0.01                                               | 320.00                              | 0.12                    |
| L9  | Kalgård Sø          | 56.013°N,9.453°E | 30692            | SRS518507     | 6.50 | 4.79                      | 0.01                     | 0.02                      | 0.32                     | 0.02                                               | 60.00                               | 0.09                    |
| L10 | Tranevig Sø         | 56.146°N,9.517°E | 28582            | SRS518498     | 7.00 | 14.60                     | 0.05                     | 3.07                      | 1.08                     | 0.02                                               | 332.00                              | 0.03                    |
| L11 | Slåen Sø            | 56.123°N,9.618°E | 19817            | SRS518645     | 7.50 | 2.41                      | 0.01                     | 0.02                      | 0.02                     | 0.23                                               | 266.00                              | 0.18                    |
| L12 | Silkeborg<br>Langsø | 56.170°N,9.522°E | 31271            | SRS518500     | 7.60 | 5.35                      | 0.08                     | 3.23                      | 1.05                     | 0.15                                               | 208.00                              | 0.43                    |
| L13 | Søby Sø             | 56.048°N,9.070°E | 27043            | SRS518501     | 7.66 | 3.50                      | 0.02                     | 0.08                      | 0.35                     | 0.05                                               | 183.00                              | 0.73                    |
| L14 | Nedenskov Sø        | 56.011°N,9.679°E | 28017            | SRS518416     | 7.70 | 5.63                      | 0.03                     | 0.02                      | 0.51                     | 0.10                                               | 373.00                              | 0.10                    |
| L15 | Lyng Sø             | 56.159°N,9.545°E | 27026            | SRS518499     | 7.70 | 7.68                      | 0.24                     | 0.27                      | 2.35                     | 0.03                                               | 230.00                              | 0.10                    |
| L16 | Karl Sø             | 56.013°N,9.543°E | 22793            | SRS518420     | 7.74 | 6.56                      | 0.01                     | 0.01                      | 1.40                     | 0.23                                               | 351.00                              | 0.07                    |
| L17 | Blid Sø             | 56.048°N,9.665°E | 19739            | SRS518414     | 7.80 | 5.61                      | 0.02                     | 0.02                      | 0.52                     | 0.01                                               | 186.00                              | 0.05                    |
| L18 | Ørn Sø              | 56.155°N,9.521°E | 20818            | SRS518423     | 7.80 | 2.73                      | 0.06                     | 51.00                     | 1.17                     | 0.49                                               | 397.00                              | 0.42                    |
| L19 | Torup Sø            | 56.015°N,9.432°E | 21222            | SRS518508     | 7.80 | 4.75                      | 0.06                     | 0.02                      | 1.00                     | 0.20                                               | 203.00                              | 0.18                    |
| L20 | Kvind Sø            | 56.027°N,9.497°E | 22192            | SRS518421     | 7.90 | 5.47                      | 0.12                     | 0.45                      | 2.58                     | 0.81                                               | 308.00                              | 0.17                    |
| L21 | Almind Sø           | 56.154°N,9.539°E | 26795            | SRS518422     | 8.00 | 2.37                      | 0.01                     | 0.05                      | 0.28                     | 0.03                                               | 205.00                              | 0.53                    |
| L22 | Væng Sø             | 56.036°N,9.655°E | 27593            | SRS518079     | 8.30 | 4.01                      | 0.09                     | 0.21                      | 0.75                     | 0.00                                               | 274.00                              | 0.15                    |
| L23 | Hampen Sø           | 56.020°N,9.388°E | 21224            | SRS518569     | 8.70 | 5.17                      | 0.03                     | 0.08                      | 0.41                     | 0.00                                               | 99.00                               | 0.76                    |
| L24 | Ring Sø             | 55.965°N,9.596°E | 19168            | SRS518418     | 8.70 | 5.81                      | 0.13                     | 0.06                      | 0.80                     | 0.12                                               | 277.00                              | 0.23                    |
| L25 | Stigsholm Sø        | 55.977°N,9.490°E | 34881            | SRS518419     | 8.80 | 4.86                      | 0.06                     | 0.17                      | 1.95                     | 1.48                                               | 236.00                              | 0.22                    |

21 **TABLE S2** Relative weight of the predictor environmental variables to the relative abundances of the different phyla in multiple regression. The  
 22 relative weight was estimated by using a Heuristic method. The relative weight means the proportionate contribution each environmental variable  
 23 makes to  $R^2$ , considering both its unique contribution and its contribution when combined with other variables.

24

| Index                      | pH     | TOC<br>(mg·L <sup>-1</sup> ) | TP<br>(mg·L <sup>-1</sup> ) | TFe<br>(mg·L <sup>-1</sup> ) | TN<br>(mg·L <sup>-1</sup> ) | NO <sub>x</sub> <sup>-</sup><br>(mg·L <sup>-1</sup> ) | Conductivity<br>(μS·cm <sup>-1</sup> ) | Area<br>(km <sup>2</sup> ) |
|----------------------------|--------|------------------------------|-----------------------------|------------------------------|-----------------------------|-------------------------------------------------------|----------------------------------------|----------------------------|
| <i>Alphaproteobacteria</i> | 57.25% | 1.56%                        | 2.07%                       | 3.10%                        | 3.84%                       | 17.26%                                                | 9.53%                                  | 5.38%                      |
| <i>Betaproteobacteria</i>  | 76.22% | 1.70%                        | 5.81%                       | 2.60%                        | 3.39%                       | 2.23%                                                 | 0.74%                                  | 7.32%                      |
| <i>Acidobacteria</i>       | 66.41% | 12.80%                       | 1.32%                       | 0.41%                        | 1.93%                       | 2.65%                                                 | 4.15%                                  | 10.33%                     |
| <i>Actinobacteria</i>      | 65.83% | 1.09%                        | 2.24%                       | 11.67%                       | 6.25%                       | 0.91%                                                 | 5.38%                                  | 6.63%                      |
| <i>Bacteroidetes</i>       | 30.14% | 2.72%                        | 3.41%                       | 9.66%                        | 14.32%                      | 17.08%                                                | 7.55%                                  | 15.10%                     |
| <i>Gammaproteobacteria</i> | 19.08% | 2.69%                        | 14.95%                      | 7.81%                        | 18.43%                      | 8.28%                                                 | 6.22%                                  | 22.52%                     |

25

26 **TABLE S3** Multiple regression on distance matrices (MRM) of community composition relative to geographical distance and distance of  
 27 standardized environmental parameters. The environmental parameters were selected by the BIOENV procedure in the vegan package in R. G:  
 28 geographical distance; E: environmental distance.

| Factors       | Taxonomic composition | Phylogenetic composition |
|---------------|-----------------------|--------------------------|
|               | pH, TOC               | pH, TOC                  |
| Pure E        | 38.27%                | 46.20%                   |
| Pure G        | 2.24%                 | 3.72%                    |
| Shared effect | 9.66%                 | 13.03%                   |
| Residuals     | 49.83%                | 37.05%                   |

29
